# Supplementary material for: A synchronous-fluorescence analysis method combing with simple one-step extraction for determination of leonurine in traditional Chinese medicine
Source: Royal Society of Chemistry journal article supplement (doi:10.1039/d4ay01233j), 2024-01-01
Supplement: d4ay01233j1.pdf [file d4ay01233j1.pdf]

## Supplementary information

### A synchronous-fluorescence analysis method combining with simple one-step extraction for determination of Leonurine in traditional Chinese medicine

Wenwen Sun <sup>a</sup>, Le Wang <sup>a, \*</sup>, Xiao Zhang <sup>a</sup>, Mengxia Liu <sup>a</sup>, Pan Liu <sup>b</sup>, Ping Xu <sup>b, \*</sup>, Yi Qu <sup>a, \*</sup>

<sup>a</sup> College of Chemistry and Chemical Engineering, Shanghai University of Engineering Science, Shanghai, 201620, China.

<sup>b</sup> Shanghai Key Laboratory of Plant Functional Genomics and Resources, Shanghai Chenshan Botanical Garden, Shanghai 201602, China.

Corresponding authors:

LW: Email: [wangle316@sues.edu.cn](mailto:wangle316@sues.edu.cn)

PX: Email: [xuping01@sibs.ac.cn](mailto:xuping01@sibs.ac.cn)

YQ: Email: [yiqu@sues.edu.cn](mailto:yiqu@sues.edu.cn)

### Table of contents

|                                                          | Page  |
|----------------------------------------------------------|-------|
| 1. The chemical structures of homologous compounds.....  | S2    |
| 2. The studies of solvents, pH values and stability..... | S2    |
| 3. Steps for handling different leonurus medicines.....  | S2-S3 |

## 1. The Chemical structures of homologous compounds

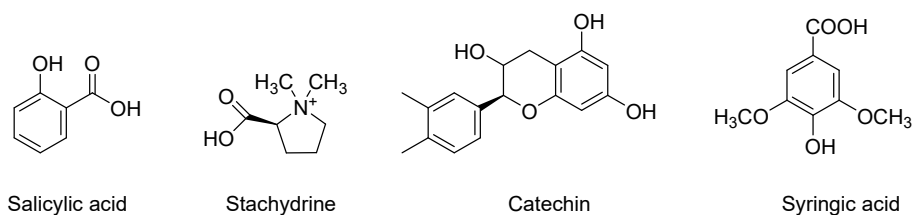

**Fig. S1** The chemical structures of salicylic acid, stachydrine, catechin and syringic acid

## 2. The studies of solvents, pH values and stability

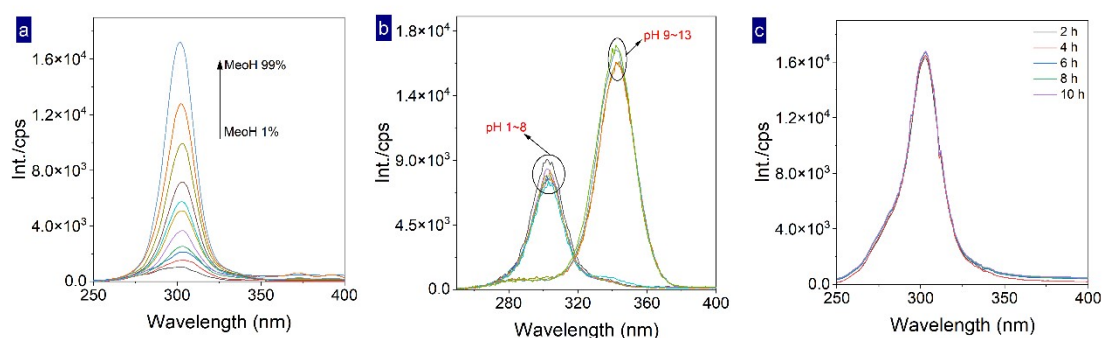

**Fig. S2** (a) Synchronous fluorescence spectra of leonurine (10 μM) in different ratio of MeOH/H<sub>2</sub>O solutions,  $\Delta\lambda = 30$  nm; (b) Synchronous fluorescence spectra of leonurine (10 μM) at different pH values (Methanol/H<sub>2</sub>O, 7:3, v/v),  $\Delta\lambda = 30$  nm; (c) Synchronous fluorescence spectra of leonurine (10 μM) for 10 hours in (Methanol/H<sub>2</sub>O, 7:3, v/v, pH=7.4),  $\Delta\lambda = 30$  nm, 25°C

## 3. Steps for handling leonurus medicines

Considering the insolubility of leonurus ointments and pills in methanol solution, two samples of the same weight were taken from the same location of the samples were immersed in methanol solution containing leonurine (10 μM) for 24 h; the samples were dried, and then the powdered samples were added to Methanol/H<sub>2</sub>O (7:3, v/v) solution, and the solution was filtered, and the filtrate was kept for testing.

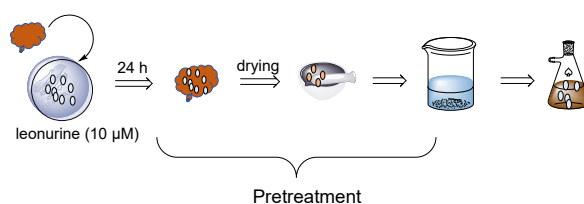

**Fig. S3** The flowchart for leonurine detection in real samples of *Leonurus ointments* and *pills*.
